# Supplementary material
Source: HighWire-hosted journal article supplement (https://bmjpaedsopen.bmj.com/content/7/1/e002048)
Supplement: inline-supplementary-material-1 [file inline-supplementary-material-1.pdf]

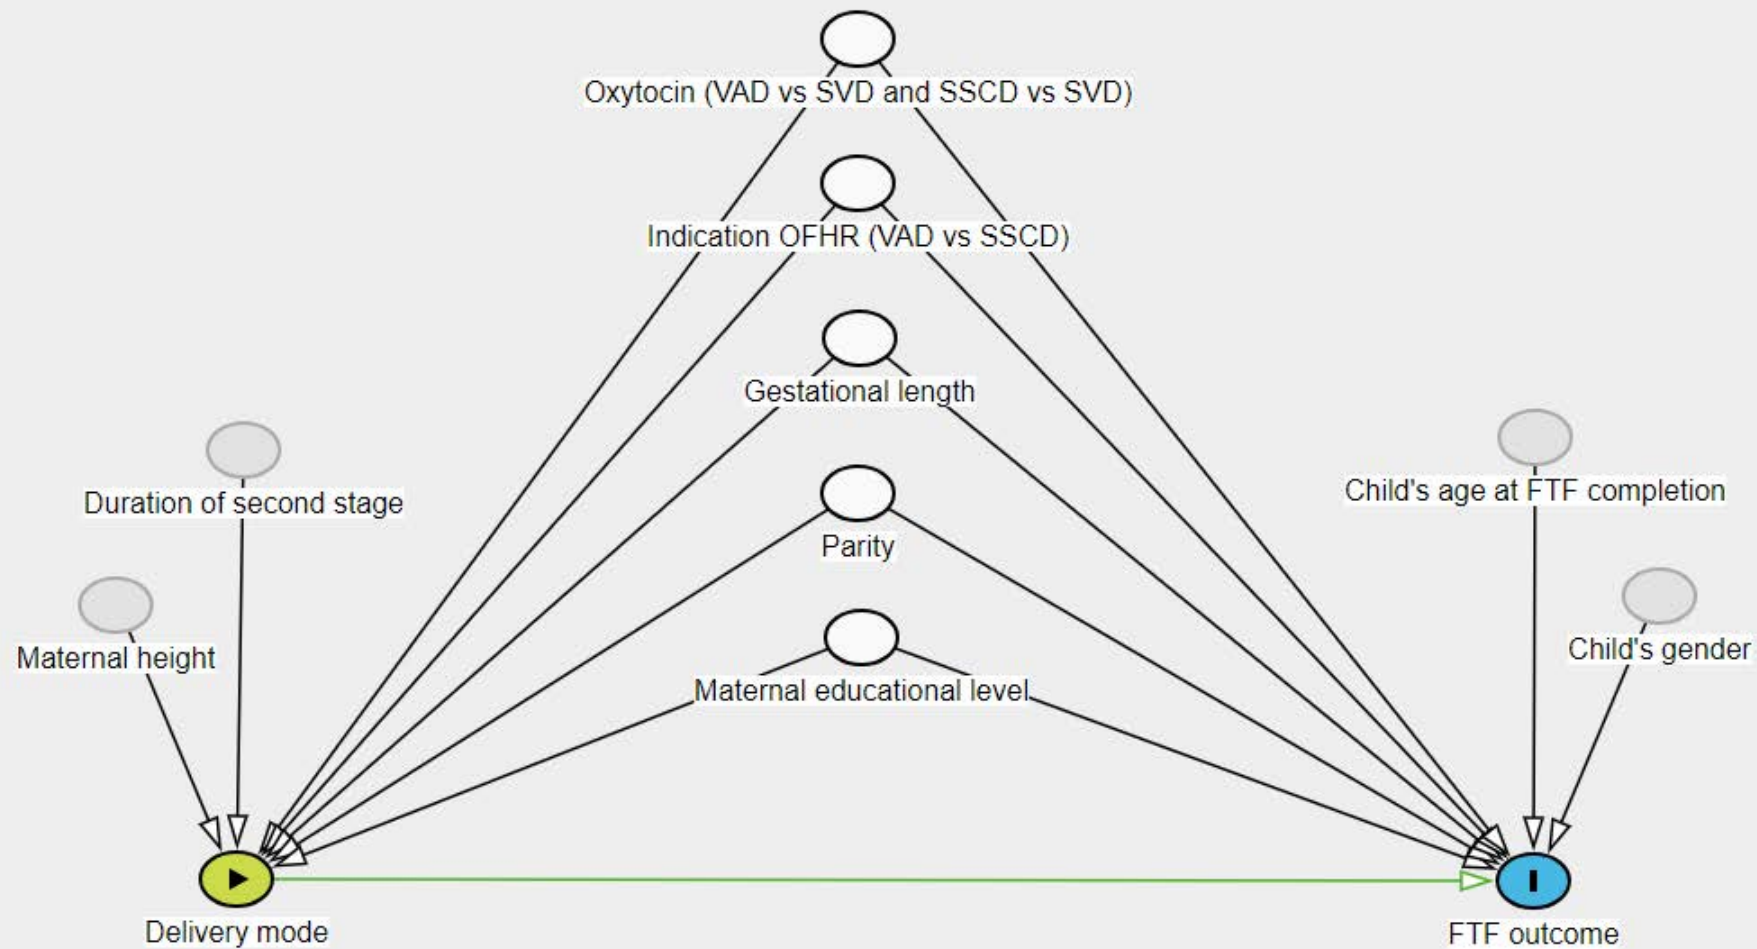

Figure S1: Directed Acyclic Graph (DAG)
